## Correction: MicroRNA-21 promotes TGF- $\beta$ 1-induced epithelial-mesenchymal transition in gastric cancer through up-regulating PTEN expression

Chang Li<sup>1</sup>, Lei Song<sup>2</sup>, Zhuo Zhang<sup>3</sup>, Xiao-Xue Bai<sup>4</sup>, Ming-Fu Cui<sup>1</sup> and Lian-Jun Ma<sup>5</sup>

<sup>1</sup>Department of Gastrointestinal Surgery, China-Japan Union Hospital of Jilin University, Changchun, 130000, Jilin, P.R. China

<sup>2</sup>Department of Respiratory Medicine, The First Hospital of Jilin University, Changchun, 130000, Jilin, P.R. China

<sup>3</sup>Department of Orthopaedics, China-Japan Union Hospital of Jilin University, Changchun, 130000, Jilin, P.R. China

<sup>4</sup>Department of Cadre Ward, The First Hospital of Jilin University, Changchun, 130000, Jilin, P.R. China

<sup>5</sup>Department of Endoscopics, China-Japan Union Hospital of Jilin University, Changchun, 130000, Jilin, P.R. China

**Published:** August 25, 2020

**Copyright:** Li et al. This is an open-access article distributed under the terms of the Creative Commons Attribution License 3.0 (CC BY 3.0), which permits unrestricted use, distribution, and reproduction in any medium, provided the original author and source are credited.

**This article has been corrected:** Due to errors during typesetting, the image for Figure 4D displays the wrong group. The corrected Figure 4 is shown below. The authors declare that these corrections do not change the results or conclusions of this paper.

Original article: Oncotarget. 2016; 7:66989–67003. <https://doi.org/10.18632/oncotarget.11888>

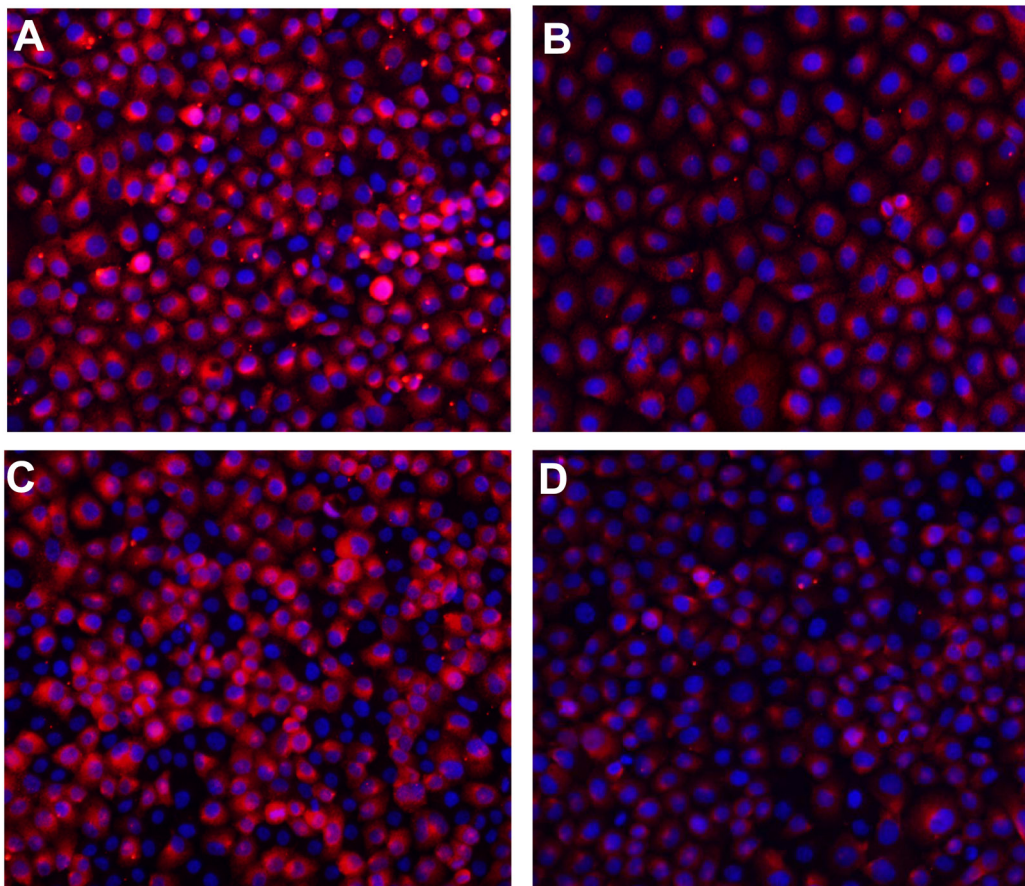

**Figure 4: Immunofluorescence staining of E-cadherin expression in SGC-7901 and KATO-III cells after TGF- $\beta$ 1 treatment for 48 h ( $\times 200$ ).** (A) E-cadherin expression in SGC-7901 cells in the BSA control group; (B) E-cadherin expression in SGC-7901 cells with TGF- $\beta$ 1 treatment; (C) E-cadherin expression in KATO-III cells in the BSA control group; (D) E-cadherin expression in KATO-III cells with TGF- $\beta$ 1 treatment). Note: TGF- $\beta$ 1, transforming growth factor  $\beta$ 1; GC, gastric cancer; BSA, bovine serum albumin.
